# Supplementary material for: The Green Frontier: Innovative Iron Oxide Nanoparticles Synthesis through Dieffenbachia Camilla’s Natural Chemistry
Source: Research Square preprint supplement (doi:10.21203/rs.3.rs-7471129/v1), 2025-08-28
Supplement: Supplementary file 1 [file d19b944fbdbdfe41e18986e9.docx]

# Highlights

• *Dieffenbachia camilla* extract was employed as a natural reducing and stabilizing agent for green synthesis of iron oxide nanoparticles (FeONPs).

• Two precursors, Iron (III) chloride and Iron (II) sulphate heptahydrate, were tested for FeONPs production, with FeSO₄·7H₂O yielding superior photocatalytic performance.

• Comprehensive characterization was carried out using UV–vis, DLS, SEM, FTIR, Raman spectroscopy, and XRD to confirm nanoparticle formation, size, morphology, and stability.

• FeONPs demonstrated notable antioxidant activity in DPPH free radical scavenging assays, indicating therapeutic potential against oxidative stress.

• Antibacterial studies showed inhibition zones against Gram-positive (*Bacillus subtilis*) and Gram-negative (*Escherichia coli*) bacteria, confirming antimicrobial efficacy.

• Photocatalytic experiments revealed significant degradation of organic dyes (methylene blue, methyl red, methyl orange), highlighting environmental remediation potential.

• The multifunctional FeONPs produced via this eco-friendly approach present promising applications in biomedical, industrial, and environmental fields.
